# Supplementary material for: Genomic testing in 1019 individuals from 349 Pakistani families results in high diagnostic yield and clinical utility
Source: PubMed Central journal article supplement (PMC7536406; doi:10.1038/s41525-020-00150-z), 2020-10-05
Supplement: 41525_2020_150_MOESM1_ESM.pdf [file 41525_2020_150_MOESM1_ESM.pdf]

## **Supplementary information**

### **Genomic testing in more than 1,019 individuals from 349 Pakistani families results in high diagnostic yield and clinical utility**

Huma Cheema<sup>1\*</sup>, Aida M. Bertoli-Avella<sup>2\*</sup>, Volha Skrahina<sup>2</sup>, Muhammad Nadeem Anjum<sup>1</sup>, Nadia Salman<sup>1</sup>, Anjum Saeed<sup>1</sup>, Christian Beetz<sup>2</sup>, Jordi Perez-Lopez<sup>2</sup>, Maria Eugenia Rocha<sup>2</sup>, Salem Alawbathani, MD<sup>2</sup>, Catarina Pereira, Msc<sup>2</sup>, Marina Hovakimyan<sup>2</sup>, Irene Patric<sup>2</sup>, Omid Paknia<sup>2</sup>, Najim Ameziane<sup>2</sup>, Claudia Cozma<sup>2</sup>, Peter Bauer<sup>2</sup>, Arndt Rolfs<sup>2,3</sup>

<sup>1</sup> Pediatric Department of Gastroenterology. Children's Hospital of Lahore Hospital, Lahore, Pakistan

<sup>2</sup> CENTOGENE AG, Rostock, Germany

<sup>3</sup> University of Rostock, Rostock, Germany

\*Both authors contributed equally

**Figure 1:** Most frequently reported patient phenotypes based on HPOs corresponding to (A) metabolic/digestive system and (B) neurological phenotypes

Figure 1

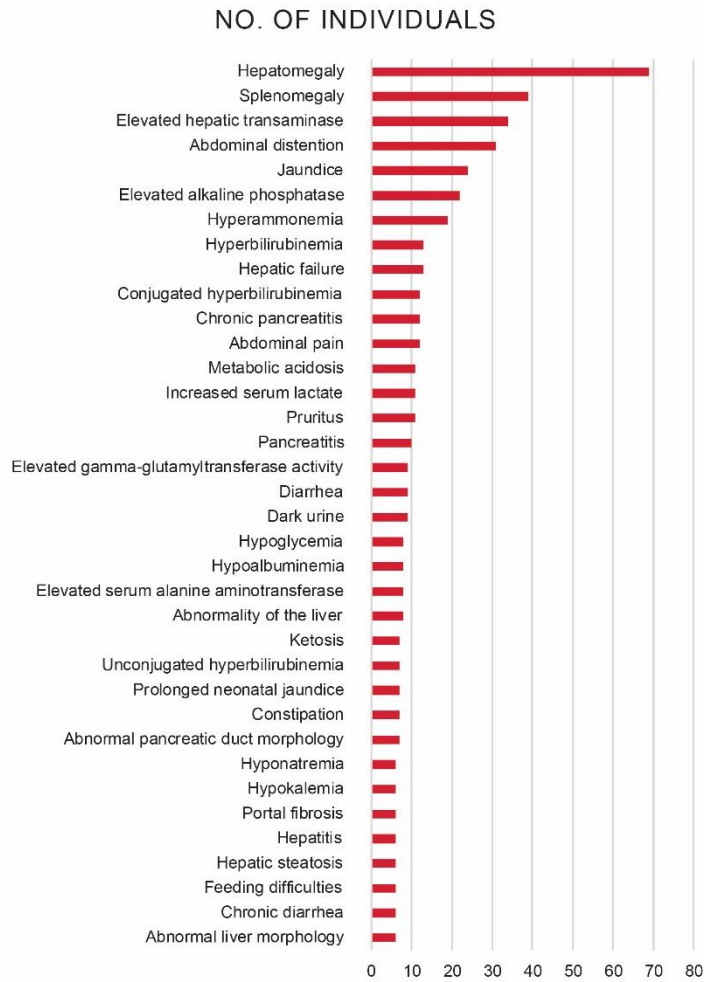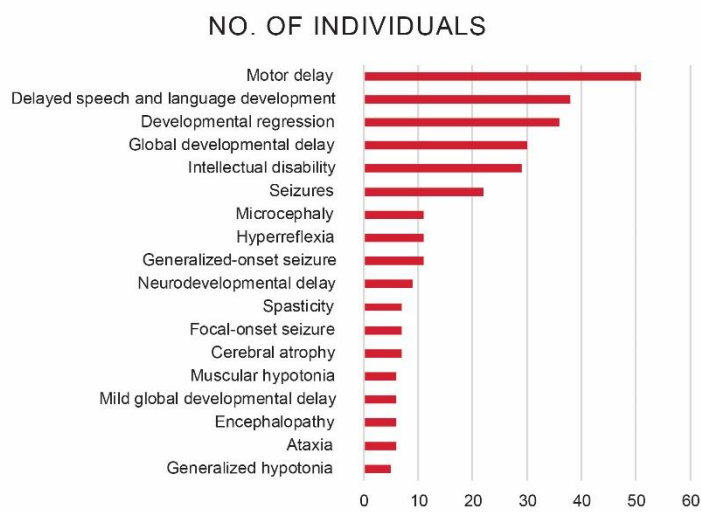

Only HPOs reported for more than 5 patients are included

**Figure 2.** Summary of genetic testing performed related to 349 index cases. NGS panels were indicated if there was a strong clinical suspicion (e.g. lysosomal disease panel). Other testing included targeted gene analysis or CMA (1 case). NGS Exome sequencing was the most ordered test. Biochemical testing was done complementary to NGS findings.

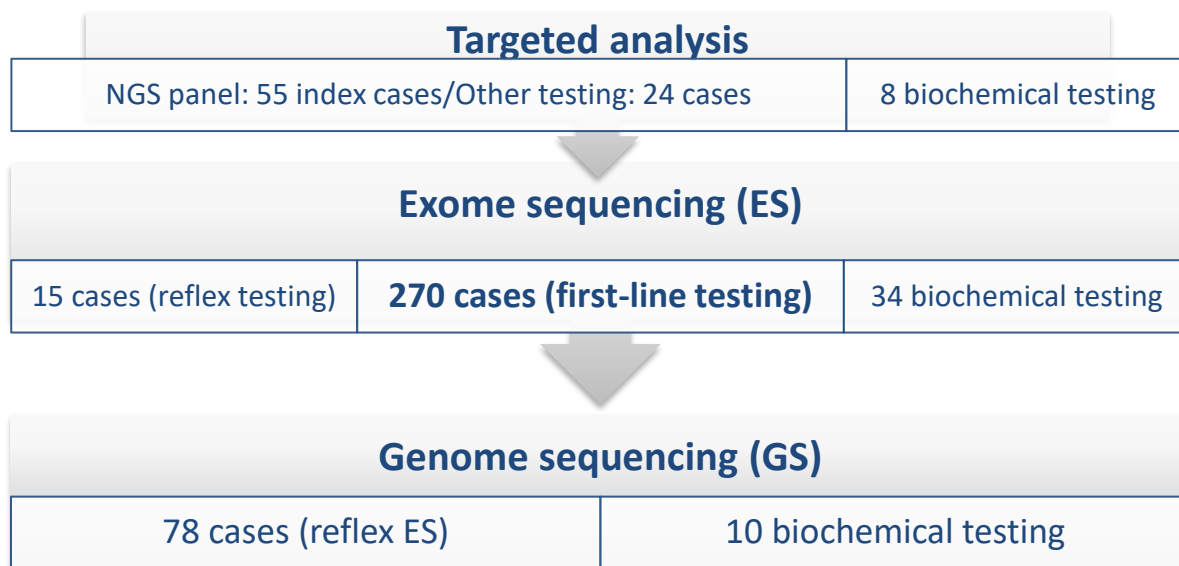

**Table 1.** Unique pathogenic and likely pathogenic variants (n=179) including SNV and CNV reported in this cohort. Note: in 15 families with deceased children, genetic testing was performed on the parents, heterozygous variants (for AR disorders) were detected with phenotype overlap with detected gene-related disease.

| Gene            | Ref.Seq. and nt change                          | Protein change      | Zygosity | Disease (OMIM)                                | MOI |
|-----------------|-------------------------------------------------|---------------------|----------|-----------------------------------------------|-----|
| <i>ABCB11</i>   | NM_003742.2:c.1156G>T                           | p.(Gly386*)         | Het      | Familial intrahepatic cholestasis type 2      | AR  |
| <i>ABCB11</i>   | NM_003742.2:c.3382C>G                           | p.(Arg1128Gly)      | Hom      | Familial intrahepatic cholestasis type 2      | AR  |
| <i>ABCB11</i>   | NM_003742.2:c.3691C>T                           | p.(Arg1231Trp)      | Hom      | Familial intrahepatic cholestasis type 2      | AR  |
| <i>ABCB11</i>   | NC_000002.11(NM_003742.2):c.908+1G>C            | Splicing            | Hom      | Familial intrahepatic cholestasis type 2      | AR  |
| <i>ABCB11</i>   | NC_000002.11(NM_003742.2):c.2178+2T>C           | Splicing            | Hom      | Familial intrahepatic cholestasis type 2      | AR  |
| <i>ABCB4</i>    | NM_018849.2:c.1783C>T                           | p.(Arg595*)         | Hom      | Familial intrahepatic cholestasis type 3      | AR  |
| <i>ABCB4</i>    | NM_018849.2:c.874A>T                            | p.(Lys292*)         | Hom      | Familial intrahepatic cholestasis type 3      | AR  |
| <i>ABCC8</i>    | NM_001351295.1:c.526dup                         | p.(Val176Glyfs*96)  | Hom      | Familial hyperinsulinemic hypoglycemia type 1 | AR  |
| <i>ABCC9</i>    | NM_005691.2:c.3190G>C                           | p.(Ala1064Pro)      | Het      | Cantu syndrome                                | AD  |
| <i>ABHD5</i>    | NM_016006.5:c.730dup                            | p.(Thr244Asnfs*10)  | Hom      | Chanarin-Dorfman syndrome                     | AR  |
| <i>ADA2</i>     | chr22:17687819-17690721del (exons 2-3 deletion) |                     | Hom      | Polyarteritis nodosa                          | AR  |
| <i>AGL</i>      | NM_000028.2:c.567dup                            | p.(Arg190*)         | Hom      | Glycogen storage disease type IIIA/IIIB       | AR  |
| <i>AGL</i>      | NM_000028.2:c.100C>T                            | p.(Arg34*)          | Hom      | Glycogen storage disease type IIIA/IIIB       | AR  |
| <i>AGL</i>      | NM_000028.2:c.1078C>T                           | p.(His360Tyr)       | Hom      | Glycogen storage disease type IIIA/IIIB       | AR  |
| <i>AGL</i>      | NM_000028.2:c.1497_1500dup                      | p.(Asp501Argfs*15)  | Hom      | Glycogen storage disease type IIIA/IIIB       | AR  |
| <i>AGL</i>      | NM_000028.2:c.753_756del                        | p.(Asp251Glufs*23)  | Hom      | Glycogen storage disease type IIIA/IIIB       | AR  |
| <i>AGL</i>      | NM_000642.2:c.2399dup                           | p.(Asp801Argfs*7)   | Hom      | Glycogen storage disease type IIIA/IIIB       | AR  |
| <i>AGXT</i>     | NM_000030.2:c.302T>C                            | p.(Leu101Pro)       | Hom      | Type I primary hyperoxaluria                  | AR  |
| <i>ALPL</i>     | NM_000478.5:c.571G>A                            | p.(Glu191Lys)       | Hom      | Odontohypophosphatasia                        | AR  |
| <i>ALS2</i>     | NM_020919.3:c.4753_4754dup                      | p.(Ser1585Argfs*34) | Hom      | Juvenile amyotrophic lateral sclerosis type 2 | AR  |
| <i>ANK1</i>     | NM_001142446.1:c.1816del                        | p.(Leu606Cysfs*64)  | Het      | Spherocytosis type 1                          | AD  |
| <i>ASL</i>      | NM_000048.3:c.545G>A                            | p.(Arg182Gln)       | Het      | Argininosuccinic aciduria                     | AR  |
| <i>ASPA</i>     | NM_000049.2:c.162C>A                            | p.(Asn54Lys)        | Hom      | Canavan disease                               | AR  |
| <i>ASPA</i>     | NM_000049.2:c.692A>G                            | p.(Tyr231Cys)       | Hom      | Canavan disease                               | AR  |
| <i>ATM</i>      | NM_000051.3:c.3503dup                           | p.(Cys1168Trpfs*11) | Hom      | Ataxia-telangiectasia                         | AR  |
| <i>ATM</i>      | NM_000051.3:c.3680_3683del                      | p.(Thr1227Asnfs*12) | Hom      | Ataxia-telangiectasia                         | AR  |
| <i>ATP6V0A4</i> | NM_020632.2:c.2257C>T                           | p.(Gln753*)         | Hom      | Distal renal tubular acidosis                 | AR  |
| <i>ATP6V0A4</i> | chr7:138400344-138400688del (exon 20 deletion)  |                     | Hom      | Distal renal tubular acidosis                 | AR  |
| <i>ATP7B</i>    | NM_000053.2:c.3182G>A                           | p.(Gly1061Glu)      | Hom      | Wilson disease                                | AR  |
| <i>ATP7B</i>    | NM_000053.2:c.3305T>C                           | p.(Ile1102Thr)      | Hom      | Wilson disease                                | AR  |

|                |                                                   |                     |     |                                                                  |    |
|----------------|---------------------------------------------------|---------------------|-----|------------------------------------------------------------------|----|
| <i>ATP7B</i>   | NM_000053.3:c.3301G>A                             | p.(Gly1101Arg)      | Hom | Wilson disease                                                   | AR |
| <i>ATP7B</i>   | NM_000053.3:c.856C>T                              | p.(Gln286*)         | Hom | Wilson disease                                                   | AR |
| <i>ATP8B1</i>  | NM_005603.4:c.1804C>T                             | p.(Arg602*)         | Hom | Familial intrahepatic cholestasis type 1                         | AR |
| <i>ATP8B1</i>  | NM_005603.4:c.589_592delinsCTCCA                  | p.(Gly197Leufs*10)  | Hom | Familial intrahepatic cholestasis type 1                         | AR |
| <i>BMPRIA</i>  | NM_004329.2:c.44_47del                            | p.(Leu15Serfs*20)   | Het | Juvenile polyposis syndrome                                      | AD |
| <i>BRCA1</i>   | NM_007300.3:c.1921dup                             | p.(Ile641Asnfs*2)   | Het | Familial breast-ovarian cancer type 1                            | AD |
| <i>BTBD</i>    | NM_001281723.2:c.104_110delinsTCC                 | p.(Cys35Phefs*36)   | Hom | Biotinidase deficiency                                           | AR |
| <i>BTBD</i>    | NM_001281723.2:c.1336G>C                          | p.(Asp446His)       | Het | Biotinidase deficiency                                           | AR |
| <i>BTBD</i>    | NM_001281723.2:c.1514_1518del                     | p.(Gly505Aspfs*6)   | Hom | Biotinidase deficiency                                           | AR |
| <i>BTK</i>     | NM_001287344.1:c.402T>A                           | p.(Tyr134*)         | Hem | Agammaglobulinemia, X-linked type 1                              | XL |
| <i>BTK</i>     | NM_001287344.1:c.865C>T                           | p.(Arg289*)         | Hem | Agammaglobulinemia, X-linked type 1                              | XL |
| <i>C1R</i>     | NM_001354346.1:c.1469_1470dup                     | p.(Trp491Profs*55)  | Het | Ehlers-Danlos syndrome periodontal type 1                        | AD |
| <i>CA5A</i>    | NM_001739.1:c.580C>T                              | p.(Gln194*)         | Hom | Carbonic anhydrase VA deficiency                                 | AR |
| <i>CBS</i>     | NM_000071.2:c.434C>T                              | p.(Pro145Leu)       | Hom | Homocystinuria                                                   | AR |
| <i>CD36</i>    | chr7:80279064-80356762del (exon 4 to 15 deletion) |                     | Hom | Platelet glycoprotein IV deficiency                              | AR |
| <i>CDC42</i>   | NM_001039802.1:c.191A>G                           | p.(Tyr64Cys)        | Het | Takenouchi-Kosaki syndrome                                       | AD |
| <i>CFTR</i>    | NM_000492.3:c.1521_1523del                        | p.(Phe508del)       | Hom | Cystic fibrosis                                                  | AR |
| <i>CFTR</i>    | NM_000492.3:c.1705T>G                             | p.(Tyr569Asp)       | Het | Cystic fibrosis                                                  | AR |
| <i>CFTR</i>    | NM_000492.3:c.2758G>A                             | p.(Val920Met)       | Het | Cystic fibrosis                                                  | AR |
| <i>CFTR</i>    | NM_000492.3:c.3209G>A                             | p.(Arg1070Gln)      | Hom | Cystic fibrosis                                                  | AR |
| <i>CHRNE</i>   | NM_000080.3:c.1367_1369del                        | p.(Asn456del)       | Hom | Congenital myasthenic syndrome type 4B, fast-channel             | AR |
| <i>CLN6</i>    | NM_017882.2:c.316dup                              | p.(Arg106Profs*26)  | Hom | Neuronal ceroid lipofuscinosis type 6                            | AR |
| <i>CNGA3</i>   | NM_001298.2:c.1306C>T                             | p.(Arg436Trp)       | Hom | Achromatopsia type 2                                             | AR |
| <i>COL17A1</i> | NM_000494.3:c.3539dup                             | p.(Gly1181Argfs*61) | Hom | Junctional epidermolysis bullosa                                 | AR |
| <i>COL4A4</i>  | NM_000092.4:c.3933C>G                             | p.(Tyr1311*)        | Hom | Alport syndrome type 2                                           | AR |
| <i>CTNS</i>    | NM_001031681.2:c.771_793del                       | p.(Gly258Serfs*30)  | Hom | Cystinosis                                                       | AR |
| <i>CYP21A2</i> | NM_000500.5:c.955C>T                              | p.(Gln319*)         | Hom | Congenital adrenal hyperplasia, due to 21-hydroxylase deficiency | AR |
| <i>CYP27A1</i> | NC_000002.11(NM_000784.3):c.1184+1G>A             | Splicing            | Hom | Cerebrotendinous xanthomatosis                                   | AR |
| <i>DBT</i>     | NM_001918.2:c.939G>C                              | p.(Lys313Asn)       | Hom | Maple syrup urine disease type II                                | AR |
| <i>DCDC2</i>   | chr6:24205090-24205614del (exon 9 deletion)       |                     | Hom | Neonatal sclerosing cholangitis                                  | AR |
| <i>DDC</i>     | NM_000790.3:c.1040G>A                             | p.(Arg347Gln)       | Het | Aromatic L-amino acid decarboxylase deficiency                   | AR |
| <i>DLD</i>     | NM_000108.3:c.685G>T                              | p.(Gly229Cys)       | Hom | Dihydrolipoamide dehydrogenase deficiency                        | AR |
| <i>DMD</i>     | NM_004006.2:c.1087C>T                             | p.(Gln363*)         | Hem | Duchenne muscular dystrophy                                      | XL |
| <i>DPYD</i>    | NM_000110.3:c.1475C>T                             | p.(Ser492Leu)       | Hom | Dihydropyrimidine dehydrogenase deficiency                       | AR |

|               |                                              |                    |     |                                                              |    |
|---------------|----------------------------------------------|--------------------|-----|--------------------------------------------------------------|----|
| <i>DSG2</i>   | NC_000018.9(NM_001943.4):c.45+1G>C           | Splicing           | Het | Arrhythmogenic right ventricular dysplasia type 10           | AD |
| <i>EPCAM</i>  | NM_002354.2:c.13C>T                          | p.(Gln5*)          | Hom | Diarrhea with congenital tufting enteropathy type 5          | AR |
| <i>EPCAM</i>  | NM_002354.2:c.439G>T                         | p.(Glu147*)        | Hom | Diarrhea with congenital tufting enteropathy type 5          | AR |
| <i>ETFDH</i>  | NM_004453.2:c.1448C>T                        | p.(Pro483Leu)      | Het | Acyl-CoA dehydrogenase deficiency, glutaric acidemia type II | AR |
| <i>ETHE1</i>  | NM_014297.3:c.487C>T                         | p.(Arg163Trp)      | Hom | Ethylmalonic encephalopathy                                  | AR |
| <i>FA2H</i>   | NM_024306.4:c.806G>A                         | p.(Arg269His)      | Hom | Spastic paraplegia type 35                                   | AR |
| <i>FAH</i>    | NC_000015.9(NM_000137.2):c.1062+5G>A         | Splicing           | Hom | Tyrosinemia type I                                           | AR |
| <i>FAH</i>    | NM_000137.2:c.192G>T                         | p.(Gln64His)       | Hom | Tyrosinemia type I                                           | AR |
| <i>FAH</i>    | NM_000137.2:c.974C>T                         | p.(Thr325Met)      | Hom | Tyrosinemia type I                                           | AR |
| <i>FBN1</i>   | NM_000138.4:c.5636G>A                        | p.(Gly1879Asp)     | Het | Marfan syndrome                                              | AD |
| <i>FBP1</i>   | NM_000507.3:c.778G>A                         | p.(Gly260Arg)      | Hom | Fructose-1,6-bisphosphatase deficiency                       | AR |
| <i>FBP1</i>   | NM_000507.3:c.841G>A                         | p.(Glu281Lys)      | Hom | Fructose-1,6-bisphosphatase deficiency                       | AR |
| <i>FBP1</i>   | NM_001127628.1:c.472C>T                      | p.(Arg158Trp)      | Hom | Fructose-1,6-bisphosphatase deficiency                       | AR |
| <i>FUCA1</i>  | NM_000147.4:c.691G>A                         | p.(Gly231Arg)      | Hom | Fucosidosis                                                  | AR |
| <i>G6PC</i>   | chr17:41062931-41063443del (exon 5 deletion) |                    | Hom | Glycogen storage disease type 1A                             | AR |
| <i>G6PC</i>   | NM_000151.3:c.61del                          | p.(Val21*)         | Hom | Glycogen storage disease type 1A                             | AR |
| <i>G6PD</i>   | NM_000402.3:c.653C>T                         | p.(Ser218Phe)      | Hem | G6PD deficient hemolytic anemia                              | XL |
| <i>G6PD</i>   | NM_000402.3:c.961G>A                         | p.(Val321Met)      | Hem | G6PD deficient hemolytic anemia                              | XL |
| <i>GALNS</i>  | <b>NM_001323544.1:c.470C&gt;T</b>            | p.(Pro157Leu)      | Hom | Mucopolysaccharidosis type IVA                               | AR |
| <i>GALNS</i>  | <b>NM_001323544.1:c.516C&gt;G</b>            | p.(His172Gln)      | Hom | Mucopolysaccharidosis type IVA                               | AR |
| <i>GALT</i>   | NM_000155.2:c.563A>G                         | p.(Gln188Arg)      | Hom | Galactosemia                                                 | AR |
| <i>GALT</i>   | NC_000009.11(NM_000155.3):c.377+1G>T         | Splicing           | Hom | Galactosemia                                                 | AR |
| <i>GBA</i>    | <b>NM_000157.3:c.1448T&gt;C</b>              | p.(Leu483Pro)      | Hom | Gaucher disease                                              | AR |
| <i>GLB1</i>   | <b>NM_001317040.1:c.1025_1026delAT</b>       | p.(Tyr342fs)       | Hom | GM1-gangliosidosis                                           | AR |
| <i>GLB1</i>   | <b>NM_001317040.1:c.1399C&gt;T</b>           | p.(Arg467Trp)      | Hom | GM1-gangliosidosis                                           | AR |
| <i>GLB1</i>   | <b>NM_001317040.1:c.1398C&gt;G</b>           | p.(Tyr466*)        | Hom | GM1-gangliosidosis                                           | AR |
| <i>GNB5</i>   | NM_016194.3:c.1032C>A                        | p.(Tyr344*)        | Hom | Intellectual developmental disorder with cardiac arrhythmia  | AR |
| <i>GNPTAB</i> | NM_024312.4:c.3503_3504del                   | p.(Leu1168Glnfs*5) | Hom | Mucopolysaccharidosis type II                                | AR |
| <i>HBB</i>    | NM_000518.4:c.27dup                          | p.(Ser10Valfs*14)  | Het | Beta-thalassemia                                             | AD |
| <i>HBB</i>    | NM_000518.4:c.51del                          | p.(Lys18Argfs*2)   | Het | Beta-thalassemia                                             | AD |
| <i>HEXA</i>   | <b>NM_000520.4:c.1274_1277dup</b>            | p.(Tyr427Ilefs*5)  | Hom | Tay-Sachs disease/GM2-gangliosidosis                         | AR |
| <i>HEXA</i>   | <b>NM_000520.5:c.902T&gt;G</b>               | p.(Met301Arg)      | Hom | Tay-Sachs disease/GM2-gangliosidosis                         | AR |
| <i>HEXA</i>   | <b>NM_000520.5:c.109T&gt;A</b>               | p.(Tyr37Asn)       | Hom | Tay-Sachs disease/GM2-gangliosidosis                         | AR |
| <i>HEXB</i>   | <b>NM_000521.3:c.850C&gt;T</b>               | p.(Arg284*)        | Hom | Sandhoff disease                                             | AR |
| <i>HEXB</i>   | <b>NM_000521.3:c.1597C&gt;T</b>              | p.(Arg533Cys)      | Hom | Sandhoff disease                                             | AR |

|               |                                                   |                    |     |                                                                                  |    |
|---------------|---------------------------------------------------|--------------------|-----|----------------------------------------------------------------------------------|----|
| <i>IDUA</i>   | chr4:996510-998191del (exons 10-14 deletion)      |                    | Hom | Mucopolysaccharidosis type I                                                     | AR |
| <i>IGHM</i>   | ENST00000390559.2:c.750dup                        | p.(Thr251Hisfs*3)  | Hom | Agammaglobulinemia type 1                                                        | AR |
| <i>IL21R</i>  | NC_000016.9(NM_181079.4):c.418+1G>C               | Splicing           | Hom | Immunodeficiency type 56                                                         | AR |
| <i>ITPA</i>   | NM_033453.3:c.136_138delinsTAA                    | p.(Gln46*)         | Hom | Early infantile epileptic encephalopathy type 35                                 | AR |
| <i>IVD</i>    | NM_002225.3:c.899C>T                              | p.(Ala300Val)      | Hom | Isovaleric acidemia                                                              | AR |
| <i>L2HGDH</i> | chr14:50731869-50732220del (exon 9 deletion)      |                    | Hom | L-2-hydroxyglutaric aciduria                                                     | AR |
| <i>LPL</i>    | NC_000008.10(NM_000237.2):c.1139+1G>A             | Splicing           | CH  | Lipoprotein lipase deficiency                                                    | AR |
| <i>LPL</i>    | NM_000237.2:c.784C>T                              | p.(Gln262*)        | CH  | Lipoprotein lipase deficiency                                                    | AR |
| <i>LPL</i>    | NM_000237.2:c.987C>A                              | p.(Tyr329*)        | Hom | Lipoprotein lipase deficiency                                                    | AR |
| <i>LPL</i>    | NM_000237.2:c.1160_1161insT                       | p.(Lys387Asnfs*26) | Hom | Lipoprotein lipase deficiency                                                    | AR |
| <i>LRBA</i>   | NC_000004.11(NM_006726.4):c.4159-1G>T             | Splicing           | Hom | Immunodeficiency type 8                                                          | AR |
| <i>LRBA</i>   | NM_006726.4:c.4333C>T                             | p.(Arg1445*)       | Hom | Immunodeficiency type 8                                                          | AR |
| <i>MAN2B1</i> | <b>NC_000019.9(NM_000528.3):c.1644+4A&gt;G</b>    | Splicing           | Hom | Alpha-Mannosidosis                                                               | AR |
| <i>MEFV</i>   | NM_000243.2:c.688G>A                              | p.(Glu230Lys)      | Het | Familial Mediterranean fever                                                     | AD |
| <i>MLH1</i>   | NM_000249.2:c.1528_1532delinsACTAGTTTG            | p.(Gln510Thrfs*6)  | Het | Hereditary nonpolyposis colorectal cancer type 2                                 | AD |
| <i>MMAA</i>   | NM_172250.2:c.72C>A                               | p.(Tyr24*)         | Hom | Methylmalonic aciduria of the cblA complementation type                          | AR |
| <i>MMACHC</i> | NM_015506.2:c.394C>T                              | p.(Arg132*)        | Hom | cblC type of combined methylmalonic aciduria and homocystinuria                  | AR |
| <i>MPV17</i>  | NM_002437.4:c.293C>T                              | p.(Pro98Leu)       | Hom | Mitochondrial DNA depletion syndrome type 6                                      | AR |
| <i>NAGLU</i>  | <b>NM_000263.3:c.1336G&gt;A</b>                   | p.(Glu446Lys)      | Hom | Mucopolysaccharidosistype IIIB                                                   | AR |
| <i>NAGLU</i>  | <b>NM_000263.3:c.291T&gt;G</b>                    | p.(Cys97Trp)       | Hom | Mucopolysaccharidosistype IIIB                                                   | AR |
| <i>NAGLU</i>  | <b>NM_000263.3:c.701G&gt;C</b>                    | p.(Arg234Pro)      | Hom | Mucopolysaccharidosistype IIIB                                                   | AR |
| <i>NALCN</i>  | NM_001350748.1:c.883del                           | p.(Arg295Valfs*19) | Het | Congenital contractures of the limbs and face, hypotonia and developmental delay | AD |
| <i>NDUFV1</i> | NM_007103.3:c.1268C>T                             | p.(Thr423Met)      | Hom | Mitochondrial complex I deficiency nuclear type 4                                | AR |
| <i>NPC1</i>   | <b>NM_000271.4:c.1097C&gt;G</b>                   | p.(Ser366*)        | Hom | Niemann-Pick disease type C1                                                     | AR |
| <i>NPC1</i>   | <b>NM_000271.4:c.2608T&gt;A</b>                   | p.(Ser870Thr)      | Hom | Niemann-Pick disease type C1                                                     | AR |
| <i>NPC1</i>   | <b>NM_000271.4:c.2978dup</b>                      | p.(Asp994Argfs*13) | Hom | Niemann-Pick disease type C1                                                     | AR |
| <i>NPC1</i>   | <b>NM_000271.4:c.3503G&gt;A</b>                   | p.(Cys1168Tyr)     | Hom | Niemann-Pick disease type C1                                                     | AR |
| <i>NPC1</i>   | <b>NM_000271.4:c.3020C&gt;T</b>                   | p.(Pro1007Leu)     | Hom | Niemann-Pick disease type C1                                                     | AR |
| <i>NPHP1</i>  | chr2:110827496-110962791del (whole gene deletion) |                    | Hom | Joubert syndrome type 4                                                          | AR |
| <i>OXCT1</i>  | NC_000005.9(NM_000436.3):c.1339-2A>G              | Splicing           | Hom | Succinyl-CoA:3-oxoacid-CoA transferase deficiency                                | AR |
| <i>PANK2</i>  | chr20:3844158-3898983del (exons 1-4 deletion)     |                    | Hom | Neurodegeneration with brain iron accumulation type 1                            | AR |

|                 |                                                     |                    |     |                                                             |    |
|-----------------|-----------------------------------------------------|--------------------|-----|-------------------------------------------------------------|----|
| <i>PEX1</i>     | NC_000007.13(NM_000466.2):c.2926+2T>C               | Splicing           | Het | Peroxisome biogenesis disorder type 1A                      | AR |
| <i>PEX1</i>     | NM_000466.2:c.2T>C                                  | p:?                | Hom | Peroxisome biogenesis disorder type 1A                      | AR |
| <i>PHKG2</i>    | NM_000294.2:c.553C>T                                | p.(Arg185*)        | Hom | Glycogen storage disease type IXc                           | AR |
| <i>PHKG2</i>    | NM_000294.2:c.454C>T                                | p.(Arg152*)        | Hom | Glycogen storage disease type IXc                           | AR |
| <i>PLA2G6</i>   | NC_000022.10(NM_003560.2):c.1742+2T>G               | Splicing           | Hom | Neurodegeneration with brain iron accumulation 2B           | AR |
| <i>PRF1</i>     | NM_001083116.1:c.921del                             | p.(His308Thrfs*22) | Het | Familial hemophagocytic lymphohistiocytosis type 2          | AR |
| <i>PRG4</i>     | NM_005807.4:c.3462_3465del                          | p.(Thr1155Leufs*7) | Hom | Camptodactyly-arthropathy-coxa vara-pericarditis syndrome   | AR |
| <i>PRSSI</i>    | chr7:141443350-142460881dup (gene duplication)      |                    | Het | Hereditary pancreatitis                                     | AD |
| <i>PRSSI</i>    | NM_002769.4:c.365G>A                                | p.(Arg122His)      | Het | Hereditary pancreatitis                                     | AD |
| <i>PRSSI</i>    | chr7:142456977-142460891dup (exons 1-5 duplication) |                    | Het | Hereditary pancreatitis                                     | AD |
| <i>PTPN11</i>   | NM_001330437.1:c.205G>A                             | p.(Glu69Lys)       | Het | Noonan syndrome type 1                                      | AD |
| <i>RELB</i>     | NM_006509.3:c.919C>T                                | p.(Arg307*)        | Hom | Immunodeficiency type 53                                    | AR |
| <i>SCN5A</i>    | NM_001099404.1:c.6046G>A                            | p.(Val2016Met)     | Het | Brugada syndrome type 1 / Long QT syndrome type 3           | AD |
| <i>SI</i>       | NM_001041.3:c.2401G>T                               | p.(Glu801*)        | Hom | Congenital sucrose-isomaltase deficiency                    | AR |
| <i>SLC19A3</i>  | NM_025243.3:c.482_483del                            | p.(Leu161Cysfs*63) | Hom | Thiamine metabolism dysfunction syndrome type 2             | AR |
| <i>SLC22A5</i>  | NM_001308122.1:c.1481C>T                            | p.(Ser494Phe)      | Hom | Primary carnitine deficiency                                | AR |
| <i>SLC25A15</i> | NM_014252.3:c.564C>G                                | p.(Phe188Leu)      | Hom | Hyperornithinemia-hyperammonemia-homocitrullinuria syndrome | AR |
| <i>SLC25A15</i> | NM_014252.3:c.44C>T                                 | p.(Ala15Val)       | Hom | Hyperornithinemia-hyperammonemia-homocitrullinuria syndrome | AR |
| <i>SLC34A3</i>  | NC_000009.11(NM_001177316.1):c.448+1G>A             | Splicing           | Hom | Hypophosphatemic rickets with hypercalciuria                | AR |
| <i>SLC37A4</i>  | NM_001164278.1:c.92_94del                           | p.(Phe31del)       | Hom | Glycogen storage disease type 1B                            | AR |
| <i>SLC37A4</i>  | NM_001164278.1:c.169_175del                         | p.(Ser57Leufs*16)  | Hom | Glycogen storage disease type 1B                            | AR |
| <i>SLC37A4</i>  | NM_001164278.1:c.936dup                             | p.(Val313Serfs*13) | Hom | Glycogen storage disease type 1B                            | AR |
| <i>SLC5A1</i>   | NM_000343.3:c.187C>T                                | p.(Arg63*)         | Hom | Glucose/galactose malabsorption                             | AR |
| <i>SMN1</i>     | chr5:70241893-70247818del (exon 7-8 deletion)       |                    | Hom | Spinal muscular atrophy type 1                              | AR |
| <i>SMN1</i>     | chr5: 70241893-70247818del (exon 7-8 deletion)      |                    | Het | Spinal muscular atrophy type 1                              | AR |
| <i>SMPD1</i>    | NM_000543.4:c.1624C>T                               | p.(Arg542*)        | Het | Niemann-Pick disease type A/B                               | AR |
| <i>SMPD1</i>    | NM_000543.4:c.1382_1383del                          | p.(His461Argfs*3)  | Hom | Niemann-Pick disease type A/B                               | AR |
| <i>SMPD1</i>    | NM_000543.4:c.1493G>A                               | p.(Arg498His)      | Hom | Niemann-Pick disease type A/B                               | AR |
| <i>SMPD1</i>    | NM_000543.4:c.314T>C                                | p.(Leu105Pro)      | Hom | Niemann-Pick disease type A/B                               | AR |
| <i>SMPD1</i>    | NM_000543.4:c.748A>C                                | p.(Ser250Arg)      | Hom | Niemann-Pick disease type A/B                               | AR |
| <i>SOD1</i>     | NM_000454.4:c.377A>C                                | p.(Asp126Ala)      | Hom | Amyotrophic lateral sclerosis type 1                        | AR |



|                 |                                                  |               |                       |                                                                                  |     |
|-----------------|--------------------------------------------------|---------------|-----------------------|----------------------------------------------------------------------------------|-----|
| <i>STXBP2</i>   | NC_000019.9(NM_001272034.1):c.1280-1G>C          | Splicing      | Hom                   | Familial hemophagocytic lymphohistiocytosis type 5                               | AR  |
| <i>TANGO2</i>   | NM_001322141.1:c.541C>T                          | p.(Arg181*)   | Hom                   | Metabolic crises with rhabdomyolysis, cardiac arrhythmias, and neurodegeneration | AR  |
| <i>TJP2</i>     | NC_000009.11(NM_001170416.1):c.332+1G>A          | Splicing      | Hom                   | Progressive familial intrahepatic cholestasis type 4                             | AR  |
| <i>TJP2</i>     | NM_001170416.1:c.2420del                         | p.(Leu807fs)  | Hom                   | Progressive familial intrahepatic cholestasis type 4                             | AR  |
| <i>TMPRSS15</i> | NM_002772.2:c.2294del                            | p.(Leu765fs)  | Hom                   | Enterokinase deficiency                                                          | AR  |
| <i>TMPRSS15</i> | NM_002772.2:c.2325del                            | p.Lys775fs    | Hom                   | Enterokinase deficiency                                                          | AR  |
| <i>TNNT2</i>    | NM_001276345.1:c.547C>T                          | p.(Arg183Trp) | Het                   | Dilated cardiomyopathy type 1D/ Left ventricular noncompaction type 6            | AD  |
| <i>TRMU</i>     | NM_018006.4:c.835G>A                             | p.(Val279Met) | Hom                   | Transient infantile liver failure                                                | AR  |
| <i>UFMI*</i>    | NC_000013.10(NM_016617.2):c.-155_-153del*        | Splicing      | Hom                   | Hypomyelinating leukodystrophy type 14                                           | AR  |
| <i>UGT1A1</i>   | NM_000463.2:c.1021C>T                            | p.(Arg341*)   | Hom                   | Crigler-Najjar syndrome type 1                                                   | AR  |
| <i>UGT1A1</i>   | NM_000463.2:c.1091C>T                            | p.(Pro364Leu) | Het                   | Crigler-Najjar syndrome type 1                                                   | AR  |
| <i>VWF</i>      | NM_000552.3: c.3931C>T                           | p.(Gln1311*)  | Hom (gene conversion) | von Willebrand disease                                                           | AR  |
| <i>WDR62</i>    | NM_001083961.1:c.1531G>A                         | p.(Asp511Asn) | Hom                   | Primary microcephaly type 2                                                      | AR  |
| <i>XIAP</i>     | chrX:123019502-123022578del (exons 2-3 deletion) |               | Hem                   | Lymphoproliferative syndrome type 2                                              | XL  |
| <i>ZBTB24</i>   | NM_014797.2:c.1369C>T                            | p.(Arg457*)   | Hom                   | Immunodeficiency-centromeric instability-facial anomalies syndrome type 2        | AR  |
| <i>Chr. 11</i>  | chr11:104288964-134937416dup                     |               | Het                   | Distal trisomy 11q                                                               | n/a |
| <i>Chr. 22</i>  | chr22:21514655-22986816del                       |               | Het                   | Distal chromosome 22q11.2 deletion syndrome                                      | n/a |
| <i>Chr. X</i>   | chrX:168551-155233098del                         |               | Het                   | Turner syndrome                                                                  | n/a |

\*Variant is published as as NM\_001286704.1:c.-273\_-271del. Variants **in bold** are presented also in table 2 (with confirmatory biochemical testing).

Hom: homozygous, Het: heterozygous, Hem; Hemizygous, CH: compound heterozygous, Ref. Seq: reference sequence, nt: nucleotide, MOI: Mode of inheritance, AR: autosomal recessive, AD: autosomal dominant, XL: X-linked. For diseases with both AD and AR MOI, the MOI corresponding to the patient has been annotated.

**Table 2.** Diseases diagnosed in this cohort and clinical impact in these patients.

| Disease                                                                          | Mode of inheritance | OMIM/ORPHA number | New therapy implemented | Referral to other specialties |
|----------------------------------------------------------------------------------|---------------------|-------------------|-------------------------|-------------------------------|
| Achromatopsia type 2                                                             | AR                  | 216900            |                         |                               |
| Acyl-CoA dehydrogenase deficiency, glutaric acidemia type II                     | AR                  | 231680            | Yes                     |                               |
| Agammaglobulinemia type I                                                        | AR                  | 601495            | Yes                     |                               |
| Agammaglobulinemia, X-linked type 1                                              | XL                  | 300755            | Yes                     |                               |
| Alpha-Mannosidosis                                                               | AR                  | 248500            |                         | Yes                           |
| Alport syndrome type 2                                                           | AR                  | 203780            | Yes                     | Yes                           |
| Amyotrophic lateral sclerosis type 1                                             | AR                  | 105400            | Yes                     | Yes                           |
| Argininosuccinic aciduria                                                        | AR                  | 207900            | Yes                     |                               |
| Aromatic L-amino acid decarboxylase deficiency                                   | AR                  | 608643            | Yes                     |                               |
| Arrhythmogenic right ventricular dysplasia type 10                               | AD                  | 610193            |                         |                               |
| Ataxia-telangiectasia                                                            | AR                  | 208900            |                         |                               |
| Beta-thalassemia                                                                 | AD                  | 613985            |                         | Yes                           |
| Biotinidase deficiency                                                           | AR                  | 253260            | Yes                     |                               |
| Brugada syndrome type 1 / Long QT syndrome type 3                                | AD                  | 601144/603830     | Yes                     | Yes                           |
| Camptodactyly-arthropathy-coxa varis-pericarditis syndrome                       | AR                  | 208250            |                         |                               |
| Canavan disease                                                                  | AR                  | 271900            |                         | Yes                           |
| Cantu syndrome                                                                   | AD                  | 239850            |                         |                               |
| Carbonic anhydrase VA deficiency                                                 | AR                  | 114761            |                         |                               |
| cbLC type of combined methylmalonic aciduria and homocystinuria                  | AR                  | 277400            |                         |                               |
| Cerebrotendinous xanthomatosis                                                   | AR                  | 213700            | Yes                     |                               |
| Chanarin-Dorfman syndrome                                                        | AR                  | 275630            |                         |                               |
| Congenital adrenal hyperplasia, due to 21-hydroxylase deficiency                 | AR                  | 201910            | Yes                     | Yes                           |
| Congenital contractures of the limbs and face, hypotonia and developmental delay | AD                  | 616266            |                         |                               |
| Congenital myasthenic syndrome type 4B, fast-channel                             | AR                  | 616324            |                         |                               |
| Congenital sucrose-isomaltase deficiency                                         | AR                  | 222900            | Yes                     |                               |
| Cystic fibrosis                                                                  | AR                  | 219700            |                         | Yes                           |
| Cystinosis                                                                       | AR                  | 219800            | Yes                     | Yes                           |
| Diarrhea with congenital tufting enteropathy type 5                              | AR                  | 613217            | Yes                     |                               |
| Dihydrolipoamide dehydrogenase deficiency                                        | AR                  | 246900            | Yes                     |                               |
| Dihydropyrimidine dehydrogenase deficiency                                       | AR                  | 274270            | Yes                     |                               |
| Dilated cardiomyopathy type 1D/ Left ventricular noncompaction type 6            | AD                  | 601494/601494     | Yes                     | Yes                           |
| Distal chromosome 22q11.2 deletion syndrome                                      | n/a                 | 611867            |                         |                               |
| Distal renal tubular acidosis                                                    | AR                  | 602722            | Yes                     | Yes                           |
| Distal trisomy 11q                                                               | n/a                 | ORPHA:96103       |                         |                               |
| Duchenne muscular dystrophy                                                      | XL                  | 310200            |                         | Yes                           |
| Early infantile epileptic encephalopathy type 35                                 | AR                  | 616647            |                         | Yes                           |
| Ehlers-Danlos syndrome periodontal type 1                                        | AD                  | 130080            |                         |                               |
| Enterokinase deficiency                                                          | AR                  | 226200            | Yes                     |                               |
| Ethylmalonic encephalopathy                                                      | AR                  | 602473            |                         | Yes                           |
| Familial breast-ovarian cancer type 1                                            | AD                  | 604370            | Yes                     | Yes                           |
| Familial hemophagocytic lymphohistiocytosis type 2                               | AR                  | 603553            | Yes                     |                               |
| Familial hemophagocytic lymphohistiocytosis type 5                               | AR                  | 613101            | Yes                     |                               |

|                                                                                  |       |                       |     |     |
|----------------------------------------------------------------------------------|-------|-----------------------|-----|-----|
| Familial hyperinsulinemic hypoglycemia type 1                                    | AR/AD | 256450                | Yes |     |
| Familial intrahepatic cholestasis type 1                                         | AR    | 211600                | Yes |     |
| Familial intrahepatic cholestasis type 2                                         | AR    | 601847                | Yes |     |
| Familial intrahepatic cholestasis type 3                                         | AR    | 602347                | Yes |     |
| Familial Mediterranean fever                                                     | AD/AR | 249100                | Yes |     |
| Fructose-1,6-bisphosphatase deficiency                                           | AR    | 229700                | Yes |     |
| Fucosidosis                                                                      | AR    | 230000                |     |     |
| G6PD deficient hemolytic anemia                                                  | XL    | 300908                | Yes | Yes |
| Galactosemia                                                                     | AR    | 230400                | Yes |     |
| Gaucher disease                                                                  | AR    | 230800, 23090, 231000 | Yes |     |
| Gilbert syndrome / Crigler-Najjar syndrome                                       | AR    | 143500, 218800        |     | Yes |
| Glucose/galactose malabsorption                                                  | AR    | 606824                | Yes |     |
| Glycogen storage disease type IXc                                                | AR    | 613027                | Yes |     |
| Glycogen storage disease type 1A                                                 | AR    | 232200                | Yes |     |
| Glycogen storage disease type 1B                                                 | AR    | 232220                | Yes |     |
| Glycogen storage disease type IIIA/IIIB                                          | AR    | 232400                | Yes |     |
| GM1-gangliosidosis                                                               | AR    | 230500                |     | Yes |
| Hereditary nonpolyposis colorectal cancer type 2                                 | AD    | 609310                | Yes |     |
| Hereditary pancreatitis                                                          | AD    | 167800                |     |     |
| Homocystinuria                                                                   | AR    | 236200                | Yes |     |
| Hyperomithinemia-hyperammonemia-homocitrullinuria syndrome                       | AR    | 238970                | Yes |     |
| Hypomyelinating leukodystrophy type 14                                           | AR    | 617899                |     | Yes |
| Hypophosphatemic rickets with hypercalciuria                                     | AR    | 241530                | Yes |     |
| Immunodeficiency type 53                                                         | AR    | 617585                | Yes |     |
| Immunodeficiency type 56                                                         | AR    | 615207                | Yes | Yes |
| Immunodeficiency type 8                                                          | AR    | 614700                | Yes |     |
| Immunodeficiency-centromeric instability-facial anomalies syndrome type 2        | AR    | 614069                | Yes |     |
| Intellectual developmental disorder with cardiac arrhythmia                      | AR    | 617173                |     | Yes |
| Isovaleric acidemia                                                              | AR    | 243500                | Yes |     |
| Joubert syndrome type 4                                                          | AR    | 609583                |     |     |
| Junctional epidermolysis bullosa                                                 | AR    | 226650                |     | Yes |
| Juvenile polyposis syndrome                                                      | AD    | 174900                | Yes | Yes |
| Juvenile amyotrophic lateral sclerosis type 2                                    | AR    | 205100                |     | Yes |
| L-2-hydroxyglutaric aciduria                                                     | AR    | 236792                | Yes |     |
| Lipoprotein lipase deficiency                                                    | AR    | 238600                | Yes |     |
| Long QT syndrome type 1                                                          | AD    | 192500                | Yes |     |
| Lymphoproliferative syndrome type 2                                              | XL    | 300635                | Yes |     |
| Maple syrup urine disease type II                                                | AR    | 248600                | Yes |     |
| Marfan syndrome                                                                  | AD    | 154700                |     | Yes |
| Metabolic crises with rhabdomyolysis, cardiac arrhythmias, and neurodegeneration | AR    | 616878                | Yes |     |
| Methylmalonic aciduria of the cblA complementation type                          | AR    | 251100                | Yes |     |
| Mitochondrial complex I deficiency nuclear type 4                                | AR    | 618225                |     |     |
| Mitochondrial DNA depletion syndrome type 6                                      | AR    | 256810                |     |     |
| Mucopolipidosis type II                                                          | AR    | 252500                |     |     |
| Mucopolysaccharidosis type I                                                     | AR    | 252800                |     |     |
| Mucopolysaccharidosis type IVA                                                   | AR    | 253000                |     | Yes |
| Mucopolysaccharidosis type IIIB                                                  | AR    | 252920                | Yes | Yes |
| Neonatal sclerosing cholangitis                                                  | AR    | 617394                | Yes |     |
| Neurodegeneration with brain iron accumulation type 1                            | AR    | 234200                |     | Yes |

|                                                      |       |                        |     |     |
|------------------------------------------------------|-------|------------------------|-----|-----|
| Neurodegeneration with brain iron accumulation 2B    | AR    | 610217                 |     | Yes |
| Neuronal ceroid lipofuscinosis type 6                | AR    | 601780                 |     | Yes |
| Niemann-Pick disease type A/B                        | AR    | 257200/607616          |     | Yes |
| Niemann-Pick disease type C1                         | AR    | 257220                 |     |     |
| Noonan syndrome type 1                               | AD    | 163950                 |     | Yes |
| Odontohypophosphatasia                               | AD/AR | 146300                 |     |     |
| Peroxisome biogenesis disorder type 1A               | AR    | 214100                 |     | Yes |
| Platelet glycoprotein IV deficiency                  | AR    | 608404                 |     |     |
| Polyarteritis nodosa                                 | AR    | 615688                 | Yes | Yes |
| Primary carnitine deficiency                         | AR    | 212140                 | Yes |     |
| Primary microcephaly type 2                          | AR    | 604317                 |     | Yes |
| Progressive familial intrahepatic cholestasis type 4 | AR    | 615878                 | Yes |     |
| Sandhoff disease                                     | AR    | 268800                 |     | Yes |
| Spastic paraplegia type 35                           | AR    | 612319                 |     | Yes |
| Spherocytosis type 1                                 | AD/AR | 182900                 | Yes | Yes |
| Spinal muscular atrophy types 1                      | AR    | 253300                 |     | Yes |
| Succinyl-CoA:3-oxoacid-CoA transferase deficiency    | AR    | 245050                 | Yes | Yes |
| Takenouchi-Kosaki syndrome                           | AD    | 616737                 |     |     |
| Tay-Sachs disease/GM2-gangliosidosis                 | AR    | 272800                 |     | Yes |
| Thiamine metabolism dysfunction syndrome type 2      | AR    | 607483                 | Yes | Yes |
| Transient infantile liver failure                    | AR    | 613070                 | Yes |     |
| Turner syndrome                                      | n/a   | ORPHA:881              |     | Yes |
| Type I primary hyperoxaluria                         | AR    | 259900                 | Yes |     |
| Tyrosinemia type I                                   | AR    | 276700                 | Yes |     |
| von Willebrand disease                               | AR    | 193400, 613554, 277480 | Yes | Yes |
| Wilson disease                                       | AR    | 277900                 | Yes |     |

AR: autosomal recessive, AD: autosomal dominant, XL: X-linked, n/a: not applicable

**Table 3.** Dual diagnoses: patients' clinical presentations and pathogenic/likely pathogenic variants identified.

| Patient | Clinical presentation                                                                                                                                                                                                                                                                                                                                                                                   | Zyg | Ref. Seq: nt change                    | Protein change | Disease 1, MOI                               | Zyg . | Ref. Seq: nt change                         | Protein change     | Disease 2, MOI                                |
|---------|---------------------------------------------------------------------------------------------------------------------------------------------------------------------------------------------------------------------------------------------------------------------------------------------------------------------------------------------------------------------------------------------------------|-----|----------------------------------------|----------------|----------------------------------------------|-------|---------------------------------------------|--------------------|-----------------------------------------------|
| 1307875 | Chronic pancreatitis, pancreatic pseudocyst                                                                                                                                                                                                                                                                                                                                                             | Het | <i>SPINK1</i><br>NM_003122.3:c.101A>G  | p.(Asn34Ser)   | Chronic pancreatitis, AD/AR                  | Hom   | <i>CBS</i><br>NM_000071.2:c.434C>T          | p.(Pro145Leu)      | Homocystinuria, AR                            |
| 1333978 | Neurodegenerative symptoms, dysarthria, seizures, ID                                                                                                                                                                                                                                                                                                                                                    | Hom | <i>HEXA</i><br>NM_001318825.1:c.109T>A | p.(Tyr37Asn)   | Tay-Sachs disease, AR                        | Het   | <i>C1R</i><br>NM_001354346.1:c.1469_1470dup | p.(Trp491Profs*55) | Ehlers-Danlos syndrome periodontal type 1, AD |
| 1361835 | Abdominal distention, acholic stools, aciduria, hepatomegaly, inability to walk, ketosis, lactic acidosis, methylmalonic acidemia, neurodevelopmental delay                                                                                                                                                                                                                                             | Hom | NM_014297.3( <i>ETHE1</i> ):c.487C>T   | p.(Arg163Trp)  | Ethylmalonic encephalopathy, AR              | Hem   | <i>G6PD</i><br>NM_000402.3:c.961G>A         | p.(Val321Met)      | G6PD deficiency, XL                           |
| 1362079 | Aggressive behavior, anemia, anisocytosis, beaking of vertebral bodies, behavioral abnormality, coarse facial features, diarrhea, dysostosis multiplex, failure to thrive, hepatomegaly, hyperactivity, hypercholesterolemia, hypertriglyceridemia, hypochromic microcytic anemia, ID, poikilocytosis, progressive neurologic deterioration, recurrent lower respiratory tract infections, splenomegaly | Hom | <i>ALPL</i><br>NM_000478.5:c.571G>A    | p.(Glu191Lys)  | Infantile hypophosphatasia, AR               | Hom   | <i>FUCA1</i><br>NM_000147.4:c.691G>A        | p.(Gly231Arg)      | Fucosidosis, AR                               |
| 1390518 | Abnormal glucose-6-phosphate dehydrogenase level, abnormal levels of alpha-fetoprotein, elevated alkaline phosphatase, elevated hepatic transaminase, hepatomegaly, hyperbilirubinemia, hypercholesterolemia, hypoalbuminemia, jaundice, neonatal onset, osteopenia, pruritus, splenomegaly, unconjugated hyperbilirubinemia                                                                            | Hom | <i>ABCB4</i><br>NM_018849.2:c.874A>T   | p.(Lys292*)    | Familial intrahepatic cholestasis type 3, AR | Hem   | <i>G6PD</i><br>NM_000402.3:c.653C>T         | p.Ser218Phe        | G6PD deficiency, XL                           |

|         |                                                                                                                                                                                                                                                              |     |                                        |                     |                                        |     |                                     |               |                             |
|---------|--------------------------------------------------------------------------------------------------------------------------------------------------------------------------------------------------------------------------------------------------------------|-----|----------------------------------------|---------------------|----------------------------------------|-----|-------------------------------------|---------------|-----------------------------|
| 1390539 | Abdominal distention, abdominal pain, abnormal biliary tract morphology, ascites, chronic pancreatitis, diarrhea, elevated hepatic transaminase, episodic vomiting, hepatomegaly, hyponatremia, pancreatic pseudocyst, recurrent pancreatitis, short stature | Hom | <i>AGL</i><br>NM_000028.2:c.753_756del | p.(Asp251Glu fs*23) | Glycogen storage disease IIIa/IIIb, AR | Het | <i>CTRC</i><br>NM_007272.2:c.703G>A | p.(Val235Ile) | Chronic pancreatitis, AD/AR |
|---------|--------------------------------------------------------------------------------------------------------------------------------------------------------------------------------------------------------------------------------------------------------------|-----|----------------------------------------|---------------------|----------------------------------------|-----|-------------------------------------|---------------|-----------------------------|

Hom: homozygous, Het: heterozygous, Hem: Hemizygous, Zyg: Zygoty, Ref. Seq: reference sequence, nt: nucleotide, MOI: Mode of inheritance, AR: autosomal recessive, AD: autosomal dominant, XL: X-linked

**Table 4.** Research findings in cases with no clear genetic diagnosis. *ITFG2*, *USP53*, and *CAP2* were validated and confirmed as ‘diagnostics’ considering previous publications and our newly identified patients.

| Gene           | DNA change <sup>1</sup>                | Protein change                                      | Zyg. | Patient phenotype                                                                                                                          | Supporting evidence                                                                                                                                                                                                        |
|----------------|----------------------------------------|-----------------------------------------------------|------|--------------------------------------------------------------------------------------------------------------------------------------------|----------------------------------------------------------------------------------------------------------------------------------------------------------------------------------------------------------------------------|
| <i>CMTM6</i>   | NC_000003.11(NM_017801.2):c.138+2T>G   | Predicted to affect splicing ( <i>CMTM6</i> gene)   | Hom  | Immunodeficiency, chronic diarrhoea, splenomegaly, FTT                                                                                     | Role in immunity as regulator of PDL1 <sup>1</sup>                                                                                                                                                                         |
| <i>CAPNS1</i>  | NC_000019.9(NM_001003962.1):c.781-1G>T | Predicted to affect splicing ( <i>CAPNS1</i> gene)  | Hom  | Muscular weakness, high CPK, dystonia, peripheral axonal neuropathy                                                                        | Essential for embryonic development Calpains have been implicated in neurodegenerative processes, such as myotonic dystrophy <sup>2,3</sup>                                                                                |
| <i>SLC15A3</i> | NC_000011.9(NM_016582.2):c.1107+1G>T   | Predicted to affect splicing ( <i>SLC15A3</i> gene) | Hom  | Immunodeficiency, chronic diarrhoea and recurrent respiratory infections, FTT                                                              | Postulated to participate in innate immune responses by regulating MAVS- and STING-mediated signalling pathways and playing an important role in regulating TLR4-mediated inflammatory responses <sup>4,5</sup>            |
| <i>CAP2</i>    | NM_006366.2:c.948T>G                   | p.(Tyr316*)                                         | Hom  | Atrial situs ambiguous, DCM, PDA, PFO, congestive heart failure. Two siblings deceased due to DCM                                          | Major role in regulating the actin cytoskeleton. Knockout mice with microphthalmia and cardiac conduction disease and dilated cardiomyopathy (DCM). Hom. splicing variant detected in two children with DCM <sup>6,7</sup> |
| <i>WNK2</i>    | NM_001282394.1:c.2736C>G               | p.(Tyr912*)                                         | Hom  | Febrile seizures, hyperreflexia, hypertonia, intellectual disability, leukodystrophy, NDD, seizures. Two similarly affected siblings (hom) | Cytoplasmic serine-threonine kinase, almost exclusively expressed in the brain as well as in cortical and thalamic neurons <sup>8</sup>                                                                                    |

|              |                                         |                                                |     |                                                                                                                                                         |                                                                                                                                                                                                                                               |
|--------------|-----------------------------------------|------------------------------------------------|-----|---------------------------------------------------------------------------------------------------------------------------------------------------------|-----------------------------------------------------------------------------------------------------------------------------------------------------------------------------------------------------------------------------------------------|
| <i>XIRP2</i> | NM_152381.5:c.68_69del                  | p.(Arg23Lysfs*2)                               | Hom | Anemia, chronic pancreatitis, sensorineural hearing impairment, thrombocytopenia                                                                        | Xirp2-null mice revealed high frequency hearing loss and stereocilia degeneration <sup>9</sup>                                                                                                                                                |
| <i>ITFG2</i> | NM_018463.3:c.361C>T                    | p.(Gln121*)                                    | Hom | NDD, regression, seizures, ataxia. Similarly affected sibling (hom)                                                                                     | Harripaul <i>et al.</i> , identified a nonsense homozygous variant, c.472G>T p.(Glu158*), in members of a consanguineous family <sup>10</sup>                                                                                                 |
| <i>USP53</i> | NM_019050.2: c.1524T>G                  | p.(Tyr508*)                                    | Hom | Hepatomegaly, hypoalbuminemia, hypoproteinemia, intrahepatic cholestasis, jaundice, leukocytosis, prolonged prothrombin time, pruritus, thrombocytosis. | Maddirevula <i>et al.</i> , identified a homozygous truncating variant in a consanguineous family with two siblings and a cousin with a syndrome of cholestasis and hearing loss <sup>11</sup>                                                |
| <i>CD5L</i>  | NM_005894.2:c.631C>T                    | p.(Arg211*)                                    | Hom | Elevated hepatic transaminase, hepatomegaly, hyperbilirubinemia, jaundice, pruritus.                                                                    | Bárcena <i>et al.</i> , reported that this gene is a pleiotropic player in liver fibrosis controlling damage, fibrosis, and immune cell content <sup>12</sup>                                                                                 |
| <i>DUSP4</i> | NC_000008.10(NM_001394.6):c.-2118A>G    | Unknown effect. <i>DUSP4</i> gene              | Hom | Tetralogy of Fallot, hypertrophic cardiomyopathy. Similarly affected sibling (hom)                                                                      | Dual specificity phosphatase 4 mediates cardiomyopathy caused by lamin A/C ( <i>LMNA</i> ) gene mutation <sup>13</sup>                                                                                                                        |
| <i>ACSL1</i> | NC_000004.12(NM_001286708.1):c.577+3A>C | Predicted to affect splicing <i>ACSL1</i> gene | Het | Ischemic heart disease, diabetes mellitus, elevated serum CPK, Increased lactate dehydrogenase.                                                         | <i>ACSL1</i> plays a key role in both the synthesis of cellular lipids and the degradation of fatty acids. In mouse model, Zhao <i>et al.</i> , showed loss of <i>Acs11</i> in mouse skeletal muscle ( <i>Acs11M<sup>-/-</sup></i> ) severely |



|             |                      |               |     |                                                              |                                                                                                                                                                                    |
|-------------|----------------------|---------------|-----|--------------------------------------------------------------|------------------------------------------------------------------------------------------------------------------------------------------------------------------------------------|
|             |                      |               |     | Mother and brother similarly affected                        | reduces acyl-CoA synthetase activity and fatty acid oxidation <sup>14</sup>                                                                                                        |
| <i>SHQ1</i> | NM_018130.2:c.850T>C | p.(Tyr284His) | Hom | Anemia, NDD, regression, dystonia, FTT, focal-onset seizures | Bizarro <i>et al.</i> identified a patient affected with a severe neurological disorder, including cerebellar degeneration with 2 heterozygous variants in this gene <sup>15</sup> |

Hom: homozygous, Het: heterozygous, NDD: Neurodevelopmental delay, FTT: failure to thrive, DCM: dilated cardiomyopathy, PDA: patent ductus arteriosus, PFO: patent foramen ovale, CPK: creatine phosphokinase

<sup>1</sup> Nomenclature of DNA variants according to HGVS recommendations, including intronic variants (e.g. NC\_000003.11(NM\_017801.2):c.138+2T>G). All variants were checked with Mutalyzer to ensure correct nomenclature.

## References

- 1 Mezzadra, R. *et al.* Identification of CMTM6 and CMTM4 as PD-L1 protein regulators. *Nature* **549**, 106-110, doi:10.1038/nature23669 (2017).
- 2 Arthur, J. S., Elce, J. S., Hegadorn, C., Williams, K. & Greer, P. A. Disruption of the murine calpain small subunit gene, *Capn4*: calpain is essential for embryonic development but not for cell growth and division. *Mol Cell Biol* **20**, 4474-4481, doi:10.1128/mcb.20.12.4474-4481.2000 (2000).
- 3 Sorimachi, H. & Ono, Y. Regulation and physiological roles of the calpain system in muscular disorders. *Cardiovasc Res* **96**, 11-22, doi:10.1093/cvr/cvs157 (2012).
- 4 He, L. *et al.* The Solute Carrier Transporter SLC15A3 Participates in Antiviral Innate Immune Responses against Herpes Simplex Virus-1. *J Immunol Res* **2018**, 5214187, doi:10.1155/2018/5214187 (2018).
- 5 Song, F. *et al.* Regulation and biological role of the peptide/histidine transporter SLC15A3 in Toll-like receptor-mediated inflammatory responses in macrophage. *Cell Death Dis* **9**, 770, doi:10.1038/s41419-018-0809-1 (2018).
- 6 Aspit, L. *et al.* CAP2 mutation leads to impaired actin dynamics and associates with supraventricular tachycardia and dilated cardiomyopathy. *J Med Genet* **56**, 228-235, doi:10.1136/jmedgenet-2018-105498 (2019).
- 7 Field, J. *et al.* CAP2 in cardiac conduction, sudden cardiac death and eye development. *Sci Rep* **5**, 17256, doi:10.1038/srep17256 (2015).
- 8 Rinehart, J. *et al.* WNK2 kinase is a novel regulator of essential neuronal cation-chloride cotransporters. *J Biol Chem* **286**, 30171-30180, doi:10.1074/jbc.M111.222893 (2011).
- 9 Francis, S. P. *et al.* A short splice form of Xin-actin binding repeat containing 2 (XIRP2) lacking the Xin repeats is required for maintenance of stereocilia morphology and hearing function. *J Neurosci* **35**, 1999-2014, doi:10.1523/JNEUROSCI.3449-14.2015 (2015).
- 10 Harripaul, R. *et al.* Mapping autosomal recessive intellectual disability: combined microarray and exome sequencing identifies 26 novel candidate genes in 192 consanguineous families. *Mol Psychiatry* **23**, 973-984, doi:10.1038/mp.2017.60 (2018).
- 11 Maddirevula, S. *et al.* Identification of novel loci for pediatric cholestatic liver disease defined by KIF12, PPM1F, USP53, LSR, and WDR83OS pathogenic variants. *Genet Med* **21**, 1164-1172, doi:10.1038/s41436-018-0288-x (2019).
- 12 Barcena, C. *et al.* CD5L is a pleiotropic player in liver fibrosis controlling damage, fibrosis and immune cell content. *EBioMedicine* **43**, 513-524, doi:10.1016/j.ebiom.2019.04.052 (2019).
- 13 Choi, J. C. *et al.* Dual specificity phosphatase 4 mediates cardiomyopathy caused by lamin A/C (LMNA) gene mutation. *J Biol Chem* **287**, 40513-40524, doi:10.1074/jbc.M112.404541 (2012).

- 14 Zhao, L. *et al.* Defective fatty acid oxidation in mice with muscle-specific acyl-CoA synthetase 1 deficiency increases amino acid use and impairs muscle function. *J Biol Chem* **294**, 8819-8833, doi:10.1074/jbc.RA118.006790 (2019).
- 15 Bizarro, J. & Meier, U. T. Inherited SHQ1 mutations impair interaction with NAP57/dyskerin, a major target in dyskeratosis congenita. *Mol Genet Genomic Med* **5**, 805-808, doi:10.1002/mgg3.314 (2017).

## Information on required consent for genetic analysis

**CENTOGENE requires a signed consent form from the patient in order to be legally able to conduct a genetic analysis. Please ensure that this signed consent form accompanies the sample(s).**

Dear patient,

Your physician has recommended a genetic analysis for you (or a person in your legal custody) to clarify the diagnosis/symptoms stated in the section “declaration of consent” below. In order to ensure that you have understood the purpose and significance of a genetic analysis, we have provided information about the testing process and potential results below.

**The purpose of a genetic analysis** is to identify the cause of a suspected disease in you or your family by analyzing your genetic material (DNA) for an abnormal change (variant) that could explain the disease you or members of your family are experiencing.

**In a genetic analysis, depending on the case, you can be tested for:**

- A single gene/variant responsible for a specific, suspected genetic disease, or
- Multiple genes (gene panels, whole exome or genome sequencing) in parallel.

**The study material** that is needed to perform the genetic analysis is stated in the test order form and is typically blood or purified DNA, but may also be tissue, saliva or buccal swab.

**Possible results from the genetic analysis:**

A genetic analysis can have one of several outcomes:

- A disease-causing DNA variant is identified confirming the diagnosis and allowing appropriate medical management by your physician (if such is available).
- A DNA variant is identified but at this time, there is not enough scientific and medical information to determine if this is a disease-causing variant or not. Your physician will discuss such a result with you and explain what further options are available to you.
- The genetic analysis results in no specific finding that can explain the symptoms. This can be due to the current limitations in scientific or medical knowledge and technology.

It is important to understand that genetic analyses – even if the result of a specific analysis is negative - are not exhaustive and

that it is therefore not possible to exclude risks for all possible genetic diseases for yourself and your family members (especially your children).

It is possible that the knowledge of the test results may result in psychological stress for you and your family. It is always recommended to discuss the results with your responsible physician.

**Incidental findings:**

Genetic analyses, particularly those involving a large number of genes such as whole exome or genome sequencing, may identify results that are not directly related to the actual reason for your testing (incidental findings). However, such findings could still be of medical importance for you and your family, as they may provide information about a risk (that you may not be aware of) for potentially serious, unavoidable or non-treatable genetic diseases.

As part of the optional sections of your consent declaration below, you can decide whether or not and under which circumstances you wish to be informed about such incidental findings.

**Family relationship findings:**

If several family members are tested, the correct interpretation of the results depends on the provided relationships between family members being accurate. If the genetic analysis reveals a possibility that there is a discrepancy in the provided relationships, CENTOGENE will not inform you, unless in exceptional cases where this information is absolutely necessary for the completion and correct medical interpretation of the requested analysis.

**Use of the health data, sample and test results:**

The sample and provided data including health data will be used for the requested analysis and along with the test results will be stored and processed in accordance with your consent declaration below.

**Right of withdrawal:**

You can withdraw your consent to the analysis with effect for the future at any time in full or in part without providing a reason.

**Right not to know:**

You have the right not to be informed about test results (right not to know) and to stop the testing processes that have been started at any time up to being given the results and to request the destruction of all analysis results.

**Pseudonymisation and Anonymisation:**

Pseudonymisation means the processing of your personal data in a way that the personal data can no longer be attributed to your person without a certain identifier, which is kept separately and protected only by CENTOGENE. "Anonymisation" refers to the process of rendering your data anonymous, which then does not allow your identification from the anonymous data at all anymore.

#### **Data protection information for patient and physician:**

In the following we want to inform you about the processing of personal data during and after the performance of the genetic analysis. "Personal data" is understood to mean all information which relates to an identified or identifiable natural person. To all such collected and processed personal data, the following applies:

- Controller and responsible entity for the processing of your personal data is CENTOGENE AG, Am Strande 7, 18055 Rostock, represented by the Executive Board members as can be found on our website (<https://www.centogene.com/about-centogene/team/executive-board.html>). You can reach our data protection officer under the same address with the addition "Attn: Data Protection Officer" or by email [dataprivacy@centogene.com](mailto:dataprivacy@centogene.com).
- Patient: By virtue of this consent form and through your physician, we collect the following data about you (in each case insofar as provided): personal details (including name and address), family relations, age/date of birth, gender, ethnicity, nationality, insurance information, symptoms and other medical information, disease, the study material / sample with identifiable genetic data, the genetic analysis results and findings. All your collected data will be stored for as long as indicated in the consent declaration. The data will be processed – partially also in data centers operated by service providers under our control and instructions - for the performance of the genetic analysis requested and for informing your physician of the results of such analysis, in each case on the basis of the consent provided. In case you have consented accordingly, such data will also be stored and processed for those further purposes as specified in the consent declaration.
- Physician: All your collected data will be processed to communicate with you about the tests and the results, as well as for invoicing, for as long as we keep identifiable data about your patients. This takes place on the basis of legal provisions allowing to process personal data for the purpose of performing a contract and for customer relation management reasons because we have a respective legitimate interest. We use data processors, which have been carefully selected and are subject to our instructions and to regular monitoring. Disclosures to data processors may result in such data being processed in countries outside of the EU (third countries). For each such transmission of data to a third country it is safeguarded that either an adequate level of protection or reasonable guarantees exist; e.g. by concluding a data processing agreement containing EU standard data protection clauses (retrievable at: [https://ec.europa.eu/info/law/law-topic/data-protection\\_en](https://ec.europa.eu/info/law/law-topic/data-protection_en)).
- You (Patient and Physician) do have the following rights regarding personal data relating to you, which you can exercise at any time, e.g. through an email to [dataprivacy@centogene.com](mailto:dataprivacy@centogene.com):
  - Right to be provided with information about and to have access to the personal data stored on you;
  - Right to have the personal data stored on you rectified or erased;
  - Right to obtain restriction of processing your personal data;
  - **Right to object on grounds relating to your particular situation;**
  - Right to data-portability (i.e. receive personal data you provided to us in a structured, commonly used and machine-readable format); and
  - Right to withdraw your consent with effect for the future at any time.
- You have the right to lodge a complaint with a supervisory authority regarding the processing of your personal data.
- You may have further or modified rights under applicable national law, which remain unaffected.
- For a more detailed and regularly updated information about how we process personal data please visit our Data Protection Statement under [www.centogene.com/data-protection](http://www.centogene.com/data-protection).

## Declaration of consent

**GENETIC ANALYSIS FOR DISEASE:**

(filled in by the

physician)

By signing this declaration of consent I acknowledge that I have received, read and understood the preceding written explanation about genetic analyses.

I also received appropriate explanations (from my physician) regarding the genetic basis, the purpose, scope, type and significance of the planned genetic analysis and achievable results, possibilities of prevention/treatment of the possible disease as well as with regard to risks associated with collecting the sample required for the genetic analysis and the knowledge of the results of the genetic analysis. All my questions have been answered and I have had the necessary time to make an informed decision about the genetic analysis.

**With my signature below I give my consent or consent on behalf of the patient for whom I am the legal guardian:**

**(1) to the genetic analysis by CENTOGENE AG, Am Strande 7, 18055 Rostock, Germany, (CENTOGENE) for the disease stated above, (2) to the collection and processing by my physician and CENTOGENE of my “Personal (Health) Data” (meaning in particular and in each case insofar as provided: personal details (including name and address), family relations, age/date of birth, gender, ethnicity, nationality, insurance information, symptoms and other medical information, disease, the study material/sample with identifiable genetic data, the genetic analysis results and findings) as far as required to conduct the genetic analysis including any necessary transfers of my Personal (Health) Data between physician and CENTOGENE across national borders, (3) to the analysis of the obtained sample and its storage for 10 years at CENTOGENE together with my patient file to be able to verify results of the analysis if need be, (4) to add to my patient file or to files of family members and to use for the above purposes – if applicable – Personal (Health) Data on me or members of my family insofar as they have consented, (5) to inform me or my physician or – if CENTOGENE has been instructed by a laboratory acting on behalf of my physician – such laboratory about the results of the genetic analysis; and (6) to provide upon request to me, my physician or – as the case may be – the requesting laboratory, the raw data of the genetic analysis.**

**By ticking the relevant “YES” boxes below, I give my additional consent or consent on behalf of the patient for whom I am the legal guardian to:**

### Reporting of incidental findings

Whole exome sequencing (WES) and whole genome sequencing (WGS) tests analyze numerous different genes at the same time. It is therefore possible that a genetic variant found in the genetic analysis is possibly not related to the cause for ordering the testing. These findings, known as incidental findings, can provide information unrelated to your reported clinical symptoms, but can be of medical value for your treatment in the future.

I understand the significance of such incidental findings and consent to CENTOGENE reporting DNA variants of the specified classes or types in certain  YES

genes in accordance with the “ACMG Recommendations for Reporting of Incidental Findings”. I understand that CENTOGENE, using its own discretion, may refrain from reporting the recommended incidental findings or additionally also report (other) non-ACMG recommended incidental findings, in each case because of additional scientific and medical information available in CENTOGENE’s databases.

**Further storage and use of my Personal (Health) Data and the sample**

I understand that my Personal (Health) Data and (remaining) sample may help in further research, development and improvement of diagnostic methods and possibly therapeutic solutions. Such measures may in the future also enable and support medical advice and guidance to me and my family members, e.g. related to the diagnosis and treatment of a potential genetic disease.

- I agree that CENTOGENE stores (1) the Personal (Health) Data I provided and information on (affected) family members - if they consented - and the results of the genetic analysis and (2) my sample (including original and processed sample) for a period of 20 years and uses this data and the remaining samples for the purpose of internal research, improvement, development and validation of analysis procedures and related product and

service developments.

YES

- I agree that after a period of 20 years my Personal (Health) Data and (remaining) sample are anonymized and ownership in the sample is then transferred to CENTOGENE. Both will then remain in CENTOGENE’s archives for use by CENTOGENE without restrictions.
- I agree that CENTOGENE may at any time process my anonymized or pseudonymized Personal (Health) Data, e.g. into its databases and datasets concerning genetic diseases, for the purpose of scientific and commercial research and to facilitate and contribute to the diagnosis of genetic changes and diseases of other patients. Access to such pseudonymised or anonymised data might be granted to external physicians, scientists and (pharmaceutical) companies for research and development purposes.
- I understand that I will not receive any compensation for the use of my Personal (Health) Data or sample by CENTOGENE.
- I understand that data in CENTOGENE’s databases – once anonymized - cannot be destroyed upon request as it is unidentifiable and untraceable.

I am aware that I can withdraw my consent with effect for the future in full or in part at any time and that I have the right not to know the results of the genetic analyses as described in the preceding written explanation.

If the undersigning is the legal guardian of the Patient, he/she herewith to confirms to provide the above consent declarations not for himself/herself but on behalf of the respective patient.

| Date | Name of Patient | Signature of Patient /Legal Guardian |
|------|-----------------|--------------------------------------|
|------|-----------------|--------------------------------------|

I hereby confirm that the consent as shown above has been declared by the patient or (as the case may be) his/her parent or legal guardian and that I have his/her signature on file if it is not shown above. I confirm that the patient is capable of giving this consent (alternatively that the consent was given by a legal guardian of the patient), that all questions of the patient have been answered, that the patient had the necessary time to consider his/her decision and that the patient until now has not exercised his/her right not to know the results of the genetic analyses. I understand that the patient may request to have his/her genetic analyses results eliminated at any time and that I shall forward such requests to CENTOGENE without undue delay. I agree that my own personal data is stored in CENTOGENE’s databases for organizational and invoicing purposes.

| Date | Name of Physician | Signature of Physician |
|------|-------------------|------------------------|
|------|-------------------|------------------------|

**CENTOGENE AG**                      **Contact Details**

Am Strande 7, 18055 Rostock, Germany [customer.support@centogene.com](mailto:customer.support@centogene.com)

Phone: +49 (0) 381 80 113 – 416 Fax: +49 (0) 381 80 113 – 401

[www.centogene.com](http://www.centogene.com)
